# Supplementary material for: Tunable ferroelectric diatomic catalysis on In 2 Se 3 monolayers for NO reduction
Source: Royal Society of Chemistry journal article supplement (doi:10.1039/d5ta07005h), 2025-01-01
Supplement: d5ta07005h1.pdf [file d5ta07005h1.pdf]

## Tunable Ferroelectric Diatomic Catalysis on $\text{In}_2\text{Se}_3$

### Monolayers for NO Reduction

Mingjuan Lu,<sup>1</sup> Ting Hu,<sup>1,\*</sup> Erjun Kan<sup>1,\*</sup>

<sup>1</sup>Department of Applied Physics and MIIT Key Laboratory of Semiconductor Microstructure and Quantum Sensing, Nanjing University of Science and Technology, Nanjing, Jiangsu 210094, P. R. China

**Table S1** The binding Characteristics of TM Atomic Clusters, including the binding energies of TM atom ( $E_{\text{b-TM}}$  in eV/atom), the d band center of TM atom ( $E_{\text{d-band}}$  in eV) and the charge lost from (positive values) or gained by (negative values) the adsorbed TM atoms ( $Q_{\text{TM}}$  in e/atom).

|                                               | $E_{\text{b-TM}}$ (eV) |       |       |       | $E_{\text{d-band}}$ (eV) |       |       |       | Average $Q_{\text{TM}}$ (eV) |       |       |       |
|-----------------------------------------------|------------------------|-------|-------|-------|--------------------------|-------|-------|-------|------------------------------|-------|-------|-------|
|                                               | 1                      | 2     | 3     | 4     | 1                        | 2     | 3     | 4     | 1                            | 2     | 3     | 4     |
| Pt/ $\text{In}_2\text{Se}_3$ ( $\uparrow$ )   | -3.28                  | -4.22 | -4.35 | -4.55 | -1.59                    | -2.48 | -2.47 | -2.58 | -0.16                        | -0.64 | +0.09 | -0.05 |
| Pt/ $\text{In}_2\text{Se}_3$ ( $\downarrow$ ) | -4.11                  | -4.35 | -5.31 | -4.73 | -1.96                    | -1.93 | -2.28 | -2.40 | -0.06                        | +0.30 | +0.40 | +0.15 |
| Pd/ $\text{In}_2\text{Se}_3$ ( $\uparrow$ )   | -2.28                  | -2.36 | -2.94 | -2.86 | -1.27                    | -1.51 | -2.35 | -2.20 | +0.01                        | +0.04 | +0.10 | -0.04 |
| Pd/ $\text{In}_2\text{Se}_3$ ( $\downarrow$ ) | -2.29                  | -3.18 | -2.95 | -3.14 | -1.26                    | -2.03 | -1.64 | -1.91 | +0.09                        | +0.43 | +0.8  | +0.29 |
| Ag/ $\text{In}_2\text{Se}_3$ ( $\uparrow$ )   | -1.20                  | -1.49 | -1.64 | -1.74 | -4.19                    | -3.34 | -4.60 | -3.62 | +0.16                        | -0.01 | +0.10 | +0.02 |
| Ag/ $\text{In}_2\text{Se}_3$ ( $\downarrow$ ) | -2.10                  | -1.97 | -2.06 | -2.05 | -4.10                    | -4.02 | -3.86 | -3.79 | +0.31                        | +0.20 | +0.15 | +0.15 |
| Au/ $\text{In}_2\text{Se}_3$ ( $\uparrow$ )   | -1.37                  | -2.03 | -1.96 | -2.25 | -2.82                    | -1.95 | -3.76 | -2.34 | -0.13                        | -0.18 | -0.06 | -0.09 |
| Au/ $\text{In}_2\text{Se}_3$ ( $\downarrow$ ) | -2.05                  | -2.17 | -2.38 | -2.49 | -3.29                    | -2.46 | -3.27 | -3.07 | +0.04                        | -0.09 | -0.02 | +0.01 |
| Ir/ $\text{In}_2\text{Se}_3$ ( $\uparrow$ )   | -3.90                  | -6.57 | -5.00 | -5.28 | -1.91                    | -2.51 | -2.26 | -2.34 | -0.15                        | +0.17 | +0.01 | +0.01 |
| Ir/ $\text{In}_2\text{Se}_3$ ( $\downarrow$ ) | -5.21                  | -6.60 | -5.50 | -6.23 | -2.30                    | -2.22 | -2.45 | -2.65 | -0.07                        | +0.55 | +0.11 | +0.24 |
| Rh/ $\text{In}_2\text{Se}_3$ ( $\uparrow$ )   | -3.23                  | -5.20 | -4.62 | -3.84 | -1.37                    | -2.12 | -2.06 | -1.92 | -0.01                        | +0.18 | +0.24 | +0.01 |
| Rh/ $\text{In}_2\text{Se}_3$ ( $\downarrow$ ) | -4.26                  | -3.58 | -5.24 | -4.58 | -1.81                    | -1.65 | -2.16 | -1.96 | +0.07                        | +0.15 | +0.41 | +0.22 |
| Ru/ $\text{In}_2\text{Se}_3$ ( $\uparrow$ )   | -4.20                  | -5.88 | -5.32 | -5.39 | -1.81                    | -2.74 | -2.47 | -2.45 | -0.2                         | +0.77 | +0.11 | +0.10 |
| Ru/ $\text{In}_2\text{Se}_3$ ( $\downarrow$ ) | -5.60                  | -5.54 | -6.27 | -6.04 | -2.05                    | -2.80 | -2.62 | -2.61 | +0.2                         | +0.29 | +0.43 | +0.34 |

**Table S2.** Comparison of relative energies for different adsorption sites of a single atom (e.g., Pt) under two polarization directions.

|                                                 | The Bridge site | The Se-Hollow site | The Top site |
|-------------------------------------------------|-----------------|--------------------|--------------|
| M/ $\text{In}_2\text{Se}_3$ ( $\uparrow$ )/eV   | -307.5493       | -307.9654          | -307.6257    |
| M/ $\text{In}_2\text{Se}_3$ ( $\downarrow$ )/eV | -308.0233       | -308.2974          | -308.1149    |

**Figure S1** Optimized geometric structures: (a) Top view of Ag atomic clusters adsorbed on

In<sub>2</sub>Se<sub>3</sub>.(b) Top and side views of transition metal (TM) diatomic species (TM = Pt, Pd, Au) adsorbed on In<sub>2</sub>Se<sub>3</sub>.

**Figure S2** Optimized geometries: (a) Top and side views of TM triatomic clusters adsorbed on In<sub>2</sub>Se<sub>3</sub>; (b) Top and side views of TM tetraatomic clusters adsorbed on In<sub>2</sub>Se<sub>3</sub> (TM = Pt, Pd, Au, Ir, Rh, Ru).

**Figure S3** (a) presents the free energy diagram for all reaction pathways of the nitric oxide reduction reaction (NORR) on the dual-atom Ir catalyst (DAC). (b) shows the free energy diagram for the NORR reaction pathways on the dual-atom Rh catalyst (DAC).

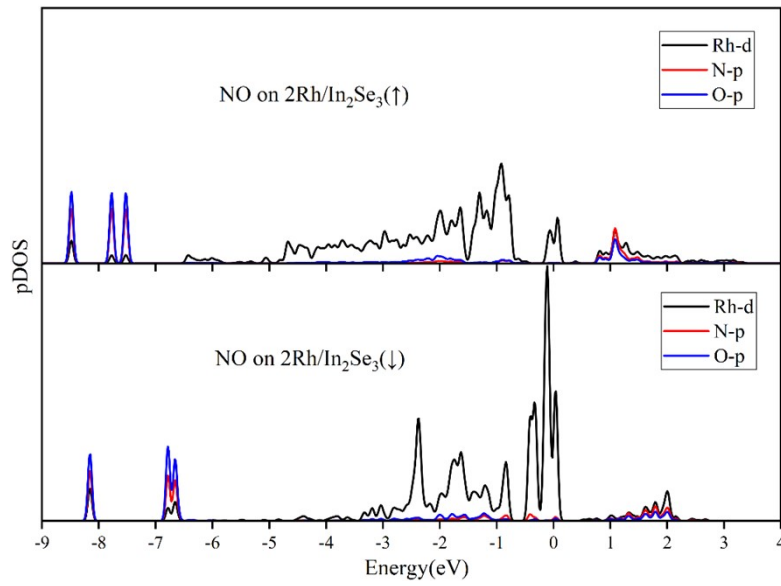

**Figure S4** The spin-up projected density of states (PDOS) for the Rh d, N p, and O p orbitals in 2Rh/In<sub>2</sub>Se<sub>3</sub>, and for the Rh d, N p, and O p orbitals in M/In<sub>2</sub>Se<sub>3</sub>.

**Figure S5** Top and side views of the Bridge site, Se-Hollow site and Top site.

## Section S1: Detailed Methodology for Electric Polarization Calculation

### 1. Theoretical Framework and Computational Implementation

The spontaneous electric polarization (P) values reported in the main text were computed using the modern theory of polarization (Berry phase formalism):

$$\begin{aligned} \delta p &= p^f - p^0 \\ &= \frac{1}{\Omega} \sum_i [q_i^f r_i^f - q_i^0 r_i^0] - \frac{2ie}{(2\pi)^3} \sum_n^{occ} \left[ \int_{BZ} d^3k e^{-ik \cdot R} \left\langle u_{nk}^f \left| \frac{\partial u_{nk}^f}{\partial k} \right\rangle - \left\langle u_{nk}^0 \left| \frac{\partial u_{nk}^0}{\partial k} \right\rangle \right] \right] \end{aligned}$$

where  $f$  and  $0$  indicate the final (polar) and initial (high symmetry) positions/wavefunctions.

This approach calculates the change in polarization ( $\Delta P$ ) along an adiabatic path connecting a reference structure to the ferroelectric ground state of interest, as implemented in the VASP code.

## 2. Calculation Pathway via $\lambda$ -Path Integration

Reference State ( $\lambda = 0$ ): A hypothetical centrosymmetric reference structure was constructed by enforcing inversion symmetry on the atomic positions of the  $\text{In}_2\text{Se}_3$  monolayer.

Polarized State ( $\lambda = 1$ ): The fully optimized ferroelectric ground-state structure of the  $\alpha\text{-In}_2\text{Se}_3$  monolayer.

For each image, a self-consistent field (SCF) calculation was performed with high-precision settings ( $\text{ENCUT} = 420$  eV,  $\text{EDIFF} = 1\text{E-}7$  eV) to obtain converged wavefunctions.

The total change in polarization  $\Delta P$  was computed by VASP through the discretized Berry phase formula evaluated along the  $\lambda$ -loop.

## 3. k-Point Convergence

The precision of the Berry phase integral is highly sensitive to Brillouin zone sampling. We rigorously tested the convergence of the calculated polarization with respect to the k-point mesh. The results confirmed that the chosen  $10 \times 10 \times 1$  Monkhorst-Pack grid is sufficient, yielding polarization values converged to within  $< 2.0$  pC/m of the values obtained with a denser  $12 \times 12 \times 1$  grid.

## 4. Directional Components of the Polarization Vector

The calculation directly outputs the full polarization vector  $P$  with its three Cartesian components ( $P_x$ ,  $P_y$ ,  $P_z$ ). The reported in-plane polarization value (324.5 pC/m) corresponds to the  $P_x$  component. The out-of-plane polarization value (27.5 pC/m) corresponds to the  $P_z$  component. The  $P_y$  component was negligible, consistent with the structural symmetry.

## 5. Key VASP Parameters

The standalone Berry phase calculation was performed using the following key parameters in the INCAR file:

- $\text{LCALCPOL} = \text{.TRUE.}$  ! Activate Berry phase calculation
- $\text{IDIPOL} = \text{.TRUE.}$  and  $\text{IDIPOL} = 3$  ! Apply dipole correction along the z-axis to eliminate spurious interactions between periodic images
- High-precision electronic settings:  $\text{ENCUT} = 420$ ,  $\text{EDIFF} = 1\text{E-}7$ ,  $\text{ISMEAR} = 0$ ,  $\text{SIGMA} = 0.05$

The final polarization values were extracted from the OUTCAR file upon successful completion of the calculation.
